# Supplementary material for: Rock, Paper, Scissors: Harnessing Complementarity in Ortholog Detection Methods Improves Comparative Genomic Inference
Source: Oxford University Press journal article supplement (doi:10.1534/g3.115.017095), 2015-03-04
Supplement: 017095_figures7.pdf [file 017095_figures7.pdf]

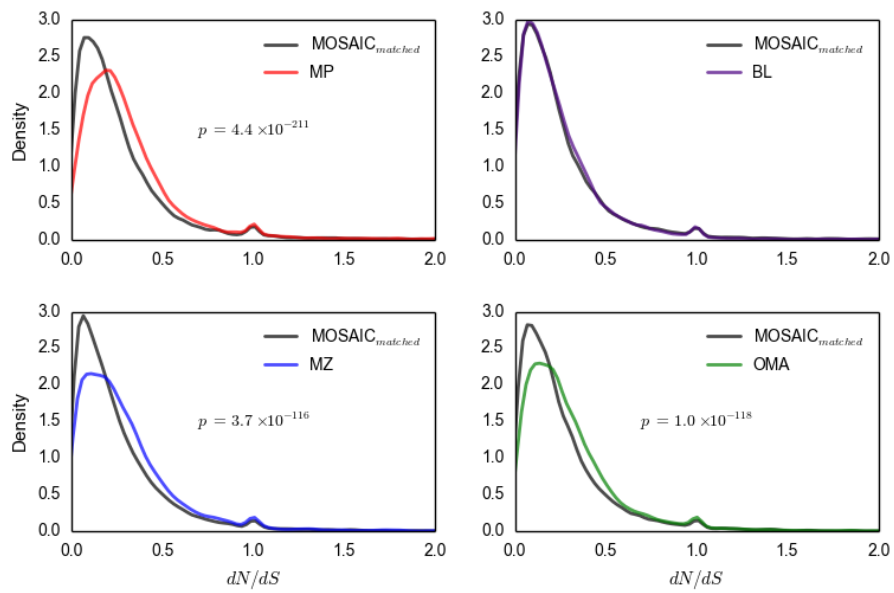

**Figure S7. The distribution of gene-level conservation (measured by  $dN/dS$ ) for each component method versus  $MOSAIC_{matched}$ .**
