# Supplementary material for: Rock, Paper, Scissors: Harnessing Complementarity in Ortholog Detection Methods Improves Comparative Genomic Inference
Source: Oxford University Press journal article supplement (doi:10.1534/g3.115.017095), 2015-03-04
Supplement: 017095_figures9.pdf [file 017095_figures9.pdf]

```

CCDS10431.1  MLNLLLALPVLASRAYAAPAPGQALQRVGIVGGQEA PRSKWPQVSLRVHGPYWMHFCGGSLIHPQWVLTAAHCVGPDV 80
Pan [[multiz]] MSLLLLALPILASPAYAAPAPGQALQRA GIVGGQEA PRSKWPQVSLRVDRYWMHFCGGSLIHPQWVLTAAHCVGPDF 80
Pon [[inpara]] MSLLLLALPVLASPAYAAPAPGQALQRVGIVGGQEA PRSKWPQVSLRVHGPYWMHFCGGSLIHPQWVLTAAHCVGPDV 80
Mac [[multiz]] MLNLLLALPVLVSPAHAAPAPGQALQRVGIVGGQEA PRSKWPQVSLRLHGPYWMHFCGGSLIHPQWVLTAAHCVGPDV 80
Cal [[OMA]] MSLLLLVLPLVSLAHSAPAPGQALPRA GIVGGQEA PGSRWPQVSLRFHSQFWMHFCGGSLIHPQWVLTAAHCLGPDV 80
Oto [[inpara]] MSLLLVLAIPILGSRVHAAPAPGQASERAGIVGGQEA PESKWPQVSLRQHTHFWMHFCGGSLIHPQWVLTAAHCVGPEV 80
Bos [[multiz]] MLHL--LALALLSLVSAAPAPGQALQRA GIVGGQEA PGSRWPQVSLRVSHQYWRHFCGGSLIHPQWVLTAAHCVGPEV 78
Equ [[inpara]] MPNLVLAIALLVNLCHAAPAPGQALE REGIVGGQEA SGSKWPQVSLRKNTFYWKHFCGGSLIHPQWVLTAAHCVGPI 80

CCDS10431.1  KDLAALRVQLREQHLYYQDQLLPVSRIIVHPQFYTA QIGADIALLELEEPVNVSSHVHTVTLPPASETFFPGMPVCWVTGW 160
Pan [[multiz]] KDLATLRVQLREQHLYYQDQLLPVSRIIVHPQFYI IQTGADIALLELEEPVNVSSRVHTVTLPPASETFFPGMPVCWVTGW 160
Pon [[inpara]] KDLAALRVQLREQHLYYQDQLLPVGR IIVHPQFYTAQTGADIALLELEEPVNVSSHVHTVTLPPASETFFPGMPVCWVTGW 160
Mac [[multiz]] KDLADLRVQLREQHLYYQDQLLPVSRIIVHPQFYAV QIGADIALLELEEPVNVSSHVHTVTLPPASETFFPGTPCWVTGW 160
Cal [[OMA]] MDLANLRVQLREQHLYYKDRLLPVSRLIVHPQFYIV QIGADIALLELEEPVNVSSHVRTVTLPPASETFFPACTPCWVTGW 160
Oto [[inpara]] QDLADLRVQLREQHLYYHDKLLPVSRIIVHPGFYMA TQIGADIALLELEEPVNVSSHVHTITLPPASETFFPGTPCWVTGW 160
Bos [[multiz]] HGPSYFRVQLREQHLYYQDQLLPISRIIVHPNY SVENGADIALLELEEPVNVSSHVHTVTLPPASETFFPGTPCWVTGW 158
Equ [[inpara]] EDFRDIRVQLREQHLYYRDQLLPVSRILPHYTYV ENGADIALLELEQDPVNVSSHVQVTLPPASETFFPGTPCWVTGW 160

CCDS10431.1  GDVDNDERLPPPPFLKQVKVPIIMENHICDAKYHLGAY TGDVRIVRDMLCAGNTRRDS CQGDSSGGPLVCKVNGTWLQAG 240
Pan [[multiz]] GDVDNDEPLPPPPFLKQVKVPIIMENHICDAKYHLGAY TGDVRIIRDMLCAGNTRRDS CQGDSSGGPLVCKVNGTWLQAG 240
Pon [[inpara]] GDVDNDEHLPPPPFLKQVKVPIIMENHICDAKYHLGL YTGDDVRIVRDMLCAGNSRRDSCQGDSSGGPLVCKVNGTWLQAG 240
Mac [[multiz]] GDVDNDVPLPPPPFLKQVKVPIIMENHICDAKYH SGLYTGDDVRIIRDMLCAGNSRRDTCQGDSSGGPLVCKVNGTWLQAG 240
Cal [[OMA]] GDVNTGEPLPPPPFLKQVKVPIIVENQVCDMKYHAG LYTGDAVHIVRDMLCAGNSRRDSCQGDSSGGPLVCKVNDTWLQAG 240
Oto [[inpara]] GDVDNDVGLPPPPFLKQVKVPIIVENHICDAKYH MGLYTGDNVHIVGDNMLCAGNTRKDS CQGDSSGGPLVCKVNGTWLQAG 240
Bos [[multiz]] GNVNDGRRLLPPPPFLKQVKVPIIVENSVC DRKYHSGLSTGDNVPIVQEDMLCAGNSRRDSCQGDSSGGPLVCKVNGTWLQAG 238
Equ [[inpara]] GDVDNGVSLPPPPFLKQVKVPIIVENSVC DRKYHSGVSTGDNIRIVQADMLCAGNSRRDSCQGDSSGGPLVCKVKG TWLQAG 240

CCDS10431.1  VVSWGEGCAQPNRPGIYTRVTY YLDWIHHYVPPKKP- 275
Pan [[multiz]] VVSWDEGCAQPNRPGIYTRVTY YLDWIHHYVPPKHX 276
Pon [[inpara]] VVSWGEGCAQPNRPGIYTRVTY YLDWIHRVVPKKP- 275
Mac [[multiz]] VVSWDEGCAQPYRPGIYTRIT Y YLDWIHRVVPKXP 276
Cal [[OMA]] VVSWGEGCALPNRPGIYTRVT Y YLDWIHQYVPPKKP- 275
Oto [[inpara]] VVSWGEGCAQPNRPGIYTRVT Y YLDWIHHYVVPKEP- 275
Bos [[multiz]] VVSWGEGCAKPNRPGIYTRVT S YLDWIHQYVPPQGPX 274
Equ [[inpara]] VVSWANSCAQPNRPGIYTRVT Y YLDWIHQYVVPKDS- 275

```

**Figure S9. The MOSAIC alignment of TPSAB1.** The MOSAIC-specific positively selected site is illustrated with the red arrow, while the site detected by several methods, including MOSAIC, is indicated in gold.
