# Supplementary material for: Rock, Paper, Scissors: Harnessing Complementarity in Ortholog Detection Methods Improves Comparative Genomic Inference
Source: Oxford University Press journal article supplement (doi:10.1534/g3.115.017095), 2015-03-04
Supplement: 017095_figures10.pdf [file 017095_figures10.pdf]

>gi|146150402|gb|ABQ02500.1|:1-275 beta 1 tryptase [Gorilla gorilla]

MLNLLLLALPVLASPAYAAPAPGQALQRAGIVGGQEAPRSKWPWQVSLRVRGQYWMHFCGGSLIHPQWVLTAAHCVGPDVKDLAALRVQLRE  
QHLYYQDQLLPVSRIIVHPQFYTAQIGADIALLELEPVNVSSHVHTVTLPPASETFFPPGMPWCWVTGWGDVDNDE<sup>R</sup>LP<sup>L</sup>PPFPLKQVKVPIMENHIC  
DAKYH<sup>L</sup>GAYTGDNVRIVRDDMLCAGNTRRDSCQGDSSGGPLVCKVNGTWLQAGVVS<sup>W</sup>GEGCAQPNRPGIYTRV<sup>T</sup>TYLDWIHHYV<sup>P</sup>PKP

**Figure S10. The *Gorilla gorilla* sequence that is orthologous to TPSAB1.** A *Gorilla gorilla gorilla* sequence was not present, presumably due to genome quality issues. For the *Gorilla gorilla* sequence, we highlight the residues of the positively selected sites indicated in Figure S9.
