# Supplementary material for: Rock, Paper, Scissors: Harnessing Complementarity in Ortholog Detection Methods Improves Comparative Genomic Inference
Source: Oxford University Press journal article supplement (doi:10.1534/g3.115.017095), 2015-03-04
Supplement: 017095_tables1.pdf [file 017095_tables1.pdf]

**Table S1. SwissProt database BLAST results for each of the putative orthologs of TPSAB1.**

| <b>Query species</b> | <b>Best match</b> | <b>% ID</b> | <b>% Similarity</b> | <b>Alignment length</b> | <b>Mismatches</b> | <b>E-value</b> |
|----------------------|-------------------|-------------|---------------------|-------------------------|-------------------|----------------|
| Chimp                | TPSAB1            | 94          | 95                  | 262                     | 15                | 0              |
| Orangutan            | TPSAB1            | 96          | 97                  | 275                     | 10                | 0              |
| Rhesus Mac.          | TPSAB1            | 92          | 95                  | 263                     | 21                | 2.0E-180       |
| Marmoset             | TPSAB1            | 85          | 90                  | 262                     | 39                | 3.0E-166       |
| Bushbaby             | TPSAB1            | 84          | 90                  | 263                     | 41                | 5.0E-167       |
| Cow                  | TPSAB1            | 77          | 86                  | 262                     | 60                | 1.0E-148       |
| Horse                | TPSAB1            | 79          | 87                  | 258                     | 54                | 2.0E-153       |
