# Supplementary material for: Rock, Paper, Scissors: Harnessing Complementarity in Ortholog Detection Methods Improves Comparative Genomic Inference
Source: PubMed Central journal article supplement (PMC4390578; doi:10.1534/g3.115.017095), 2015-02-23
Supplement: supp_g3.115.017095_FigureS3.pdf [file supp_g3.115.017095_FigureS3.pdf]

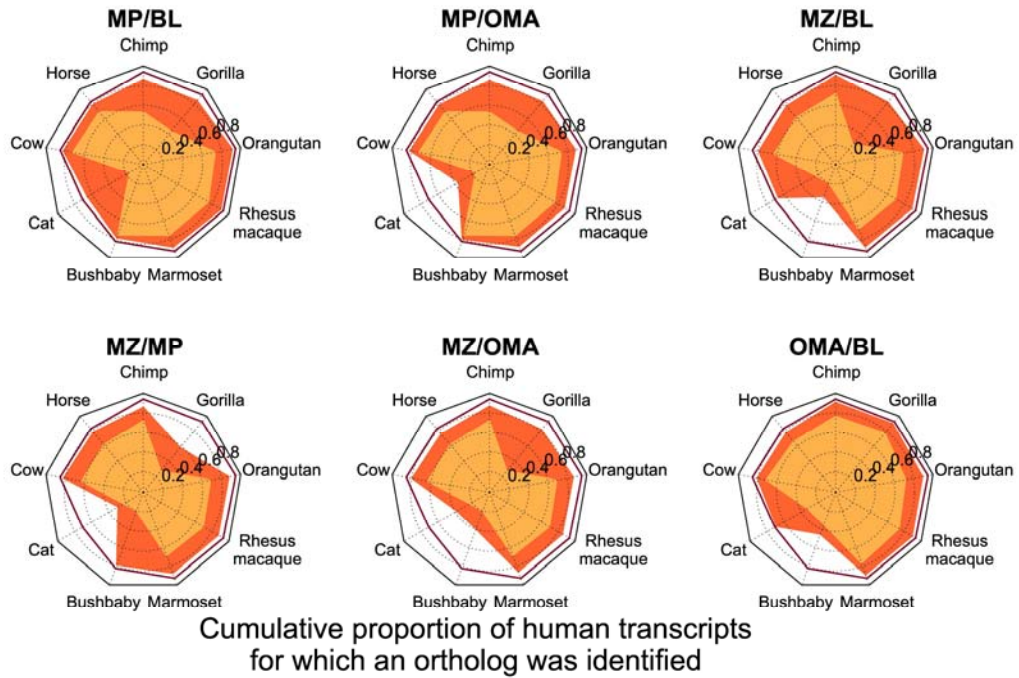

**Figure S3. The cumulative proportion of transcripts for which an ortholog is identified.** We show how all pairs of methods perform in retrieving orthologs for each species.
