# Supplementary material for: Rock, Paper, Scissors: Harnessing Complementarity in Ortholog Detection Methods Improves Comparative Genomic Inference
Source: PubMed Central journal article supplement (PMC4390578; doi:10.1534/g3.115.017095), 2015-02-23
Supplement: supp_g3.115.017095_FigureS4.pdf [file supp_g3.115.017095_FigureS4.pdf]

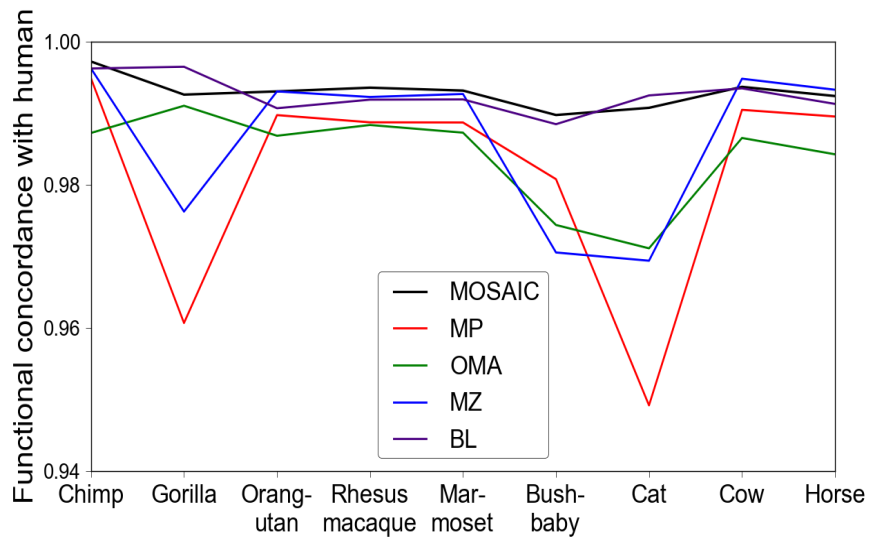

**Figure S4.** The rate of concordance between functional annotations for proposal orthologs and human transcripts.
