# Supplementary material for: Rock, Paper, Scissors: Harnessing Complementarity in Ortholog Detection Methods Improves Comparative Genomic Inference
Source: PubMed Central journal article supplement (PMC4390578; doi:10.1534/g3.115.017095), 2015-02-23
Supplement: supp_g3.115.017095_FigureS8.pdf [file supp_g3.115.017095_FigureS8.pdf]

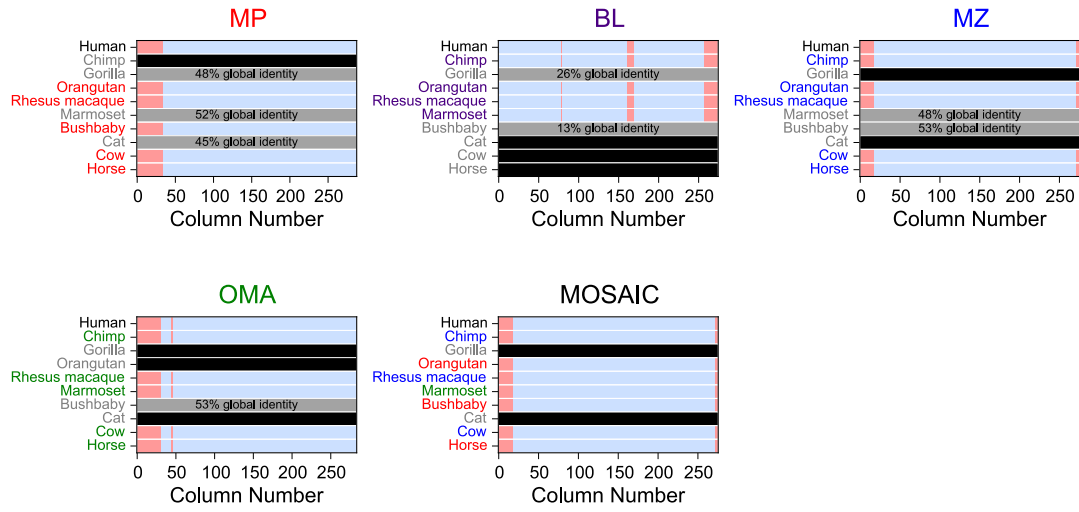

Figure S8. A representation of the alignments returned by each method for TPSAB1.
