# Supplementary material for: Rock, Paper, Scissors: Harnessing Complementarity in Ortholog Detection Methods Improves Comparative Genomic Inference
Source: G3 (Bethesda). 2015 Feb 23;5(4):629–38. doi: 10.1534/g3.115.017095 (PMC4390578; doi:10.1534/g3.115.017095)
Supplement: Supporting Information [file supp_g3.115.017095_FigureS11.pdf]

|         |           |                                                 |     |
|---------|-----------|-------------------------------------------------|-----|
| Human   | $\beta$ I | TVTLPPASETFPPGMPCWVTGWGDVDNDERLPPPFPLKQVKVPIMEN | 155 |
| Gorilla | $\beta$ 1 | -----                                           |     |
| Chimp   | $\beta$ 1 | -----S-----                                     |     |
| Orang   | $\beta$ 4 | -----H-----                                     |     |

  

|         |           |                                                 |         |
|---------|-----------|-------------------------------------------------|---------|
| Human   | $\beta$ I | HICDAKYHLGAYTGDDVRIVRDDMLCAGNTRRDSCQGDSGGPLVCKV | % # 202 |
| Gorilla | $\beta$ 1 | -----N-----                                     |         |
| Chimp   | $\beta$ 1 | -----N-----                                     |         |
| Orang   | $\beta$ 4 | -----L-----S-----                               |         |

**Figure S11.** Manually derived alignments of TPSAB1, reproduced from Trivedi et al. 2007. As above, The MOSAIC-specific positively selected site is illustrated with the red arrow, while the site detected by several methods, including MOSAIC, is indicated in gold.
